# Supplementary material for: A comparison of the molecular subtypes of triple-negative breast cancer among non-Asian and Taiwanese women
Source: PubMed Central journal article supplement (PMC5410215; doi:10.1007/s10549-017-4195-7), 2017-03-15
Supplement: 10549_2017_4195_MOESM1_ESM.pdf [file 10549_2017_4195_MOESM1_ESM.pdf]

|            |           |
|------------|-----------|
| GSE95700   | Molecular |
| Taiwanese  |           |
| GSM2522296 | BRCA01    |
| GSM2522297 | BRCA02    |
| GSM2522298 | BRCA03    |
| GSM2522299 | BRCA04    |
| GSM2522300 | BRCA05    |
| GSM2522301 | BRCA06    |
| GSM2522302 | BRCA07    |
| GSM2522303 | BRCA08    |
| GSM2522304 | BRCA09    |
| GSM2522305 | BRCA10    |
| GSM2522306 | BRCA11    |
| GSM2522307 | BRCA12    |
| GSM2522308 | BRCA13    |
| GSM2522309 | BRCA14    |
| GSM2522310 | BRCA15    |
| GSM2522311 | BRCA16    |
| GSM2522312 | BRCA17    |
| GSM2522313 | BRCA18    |
| GSM2522314 | BRCA19    |
| GSM2522315 | BRCA20    |
| GSM2522316 | BRCA21    |
| GSM2522317 | BRCA22    |
| GSM2522318 | BRCA23    |
| GSM2522319 | BRCA24    |
| GSM2522320 | BRCA25    |
| GSM2522321 | BRCA26    |
| GSM2522322 | BRCA27    |
| GSM2522323 | BRCA28    |
| GSM2522324 | BRCA29    |
| GSM2522325 | BRCA30    |
| GSM2522326 | BRCA31    |
| GSM2522327 | BRCA32    |
| GSM2522328 | BRCA33    |
| GSM2522329 | BRCA34    |
| GSM2522330 | BRCA35    |
| GSM2522331 | BRCA36    |
| GSM2522332 | BRCA37    |
| GSM2522333 | BRCA38    |
| GSM2522334 | BRCA39    |
| GSM2522335 | BRCA40    |
| GSM2522336 | BRCA41    |

|            |        |
|------------|--------|
| GSM2522337 | BRCA42 |
| GSM2522338 | BRCA43 |
| GSM2522339 | BRCA44 |
| GSM2522340 | BRCA45 |
| GSM2522341 | BRCA46 |
| GSM2522342 | BRCA47 |
| GSM2522343 | BRCA48 |
| GSM2522344 | BRCA49 |
| GSM2522345 | BRCA50 |
| GSM2522346 | BRCA51 |
| GSM2522347 | BRCA52 |
| GSM2522348 | BRCA53 |
| GSM2522349 | BRCA54 |
| GSM2522350 | BRCA55 |
| GSM2522351 | BRCA56 |
| GSM2522352 | BRCA57 |
